1 Association between SARS-CoV-2 and Stroke: Perspectives from a metaumbrella-review.

2 Andreza Maria Luzia Baldo de Souza, Universidade Estadual de Campinas/ UNICAMP,  
3 Faculdade de Odontologia de Piracicaba/FOP, departamento de Ciências da Saúde e  
4 Odontologia Infantil, <https://orcid.org/0000-0002-6575-2209>

5  
6 Enoque Fernandes de Araújo, Universidade Estadual de Campinas/ UNICAMP, Faculdade de  
7 Odontologia de Piracicaba/FOP, departamento de Ciências da Saúde e Odontologia Infantil,  
8 <https://orcid.org/0000-0003-3239-1467>

9  
10 Nelson Carvas Junior, Universidade Paulista UNIP, <https://orcid.org/0000-0003-2168-8927>

11  
12 Augusto César Raimundo, Universidade Estadual de Campinas/ UNICAMP, Faculdade de  
13 Odontologia de Piracicaba/FOP, departamento de Ciências da Saúde e Odontologia Infantil,  
14 <https://orcid.org/0000-0001-7736-9189>

15  
16 Antonio Carlos Pereira, Universidade Estadual de Campinas/ UNICAMP, Faculdade de  
17 Odontologia de Piracicaba/FOP, departamento de Ciências da Saúde e Odontologia Infantil  
18 <https://orcid.org/0000-0003-1703-8171>

19  
20 Marcelo de Castro Meneghim, Universidade Estadual de Campinas/ UNICAMP, Faculdade  
21 de Odontologia de Piracicaba/FOP, departamento de Ciências da Saúde e Odontologia  
22 Infantil, <https://orcid.org/0000-0003-2673-3627>

23  
24  
25 Address Avenida Limeira 901, Bairro Areião, CEP13414903, Piracicaba- SP, Brasil.  
26 Corresponding author Andreza Maria Luzia Baldo de Souza E-mail: [andrezamlb@gmail.com](mailto:andrezamlb@gmail.com)

27  
28 Authors' contributions: AMLB Souza contributed to the conception and design, analysis and  
29 interpretation of the data, writing of the article, and final approval of the version to be  
30 published. EFA collaborated with the conception and design, writing of the article and  
31 interpretation of the data. NCJ – analyses statistic, ACR collaborated with the conception and  
32 design, writing of the article and interpretation of the data. AC Pereira contributed with a  
33 relevant critical review of the intellectual content and final approval of the version to be  
34 published. MCM contributed with a relevant critical review of the intellectual content and  
35 final approval of the version to be published

36  
37 Keywords- SARS-CoV-2, Stroke, Risk Factors, Metaumbrella, Systematic Review.

38  
39 Word Count -5123

40  
41 Figure 1- Prism

42 Figure 2 - Quality of the ROBIS studies.

43 Figure 3. Meta Umbrella showing the association between COVID-19 and stroke.

44 Figure 4. Matrix of overlapping studies in the systematic review.

45 Figure 5. Umbrella Goal stratified by Evidence Classification.

46 Table 1 - Total participants and P values from the Egger and JK test

NOTE: This preprint reports new research that has not been certified by peer review and should not be used to guide clinical practice.

47 Association between SARS-CoV-2 and Stroke: Perspectives from metaumbrella-review.

## 48 Abstract

49 In the face of the global COVID-19 pandemic, the need arose to investigate potential  
50 complications associated with SARS-CoV-2, including the risk of Stroke. **Objective:** This  
51 study aimed to verify the association between SARS-CoV-2 and the risk of Stroke, based on  
52 systematic reviews and meta-analyses, in order to assess the inclusion of the virus as a new  
53 risk factor for cerebrovascular diseases. **Methods:** A metaumbrella was conducted, which  
54 included 34 systematic reviews, of which 4 were selected for the final analysis based on  
55 methodological quality and consistency. The analysis aggregated the results of 70 primary  
56 studies, considering different stroke subtypes and outcomes associated with COVID-19.  
57 Study heterogeneity was assessed using the  $I^2$  index, and significance bias was verified using  
58 Egger's test. **Results:** The analysis showed that the severity of COVID-19 is significantly  
59 associated with an increased risk of stroke (eOR = 2.48; 95%CI: 1.55 – 3.95), particularly for  
60 ischemic stroke (eOR = 1.76; 95%CI: 1.11 – 2.80) and hemorrhagic stroke (eOR = 3.86;  
61 95%CI: 1.79 – 8.33). Additionally, patients with cerebrovascular comorbidities had higher  
62 mortality (eOR = 2.48; 95%CI: 2.48 – 19.63), as did those who had previously suffered a  
63 stroke (eOR = 6.08; 95%CI: 3.73 – 9.91). **Conclusion:** The association between SARS-CoV-  
64 2 and stroke was consistent and significant, suggesting that COVID-19 should be considered a  
65 new risk factor for cerebrovascular diseases. However, the high heterogeneity among the  
66 studies analyzed reinforces the need for further research to consolidate this relationship.

67 **Keywords:** SARS-CoV-2, Stroke, Risk Factors, Metaumbrella, Systematic Review.

## 68 Introduction

69 Responsible for millions of deaths annually, stroke is a global public health  
70 challenge<sup>1-3</sup>. It is a sudden neurological deficit, which can be transient or permanent, caused  
71 by a vascular injury that results in ischemia or hemorrhage in areas of the brain<sup>2</sup>. Stroke is a  
72 multifactorial disease, caused by a combination of modifiable, non-modifiable, and  
73 environmental risk factors<sup>1,4,5</sup>.

74 The COVID-19 pandemic, caused by the SARS-CoV-2 virus, triggered a global health  
75 crisis<sup>6,7</sup>. Although it is primarily recognized for causing respiratory infections, recent studies  
76 have associated COVID-19 with increased risk of stroke<sup>8,9,10</sup>.

77 This association raises concerns about the mechanisms by which SARS-CoV-2 may  
78 be linked to neurological damage. Hypotheses include systemic inflammation, direct invasion  
79 of the nervous system by the virus, and complications of the immune response<sup>12,13</sup>. In  
80 addition, individuals with preexisting risk factors for stroke, such as hypertension and  
81 diabetes mellitus, seem to be more likely to develop more severe cases of COVID-19 and,  
82 consequently, a higher risk of stroke<sup>14,15,16,17,18,19</sup>.

83 This study aims to verify the association between SARS-CoV-2 and stroke, using  
84 systematic reviews as a guiding reference. The investigation seeks to contribute to the  
85 scientific debate on the possible inclusion of the virus as a risk factor for cerebrovascular  
86 diseases.

## 87 **Methodology**

88 This study is characterized as an Umbrella Review<sup>20</sup>, which aims to synthesize the  
89 evidence from multiple systematic reviews<sup>21,22</sup>. The methodology used followed the PRIO-  
90 harms<sup>23</sup> checklist to ensure the rigor and quality of the analysis. The formulation of the  
91 research question considered the following elements: population, phenomenon of interest,  
92 result, context, type of overview and general objective<sup>24,25,26</sup>. Based on the hypothesis that  
93 SARS-CoV-2 infection is associated with increased risk of stroke, the following guiding  
94 question was formulated: "Does the association between SARS-CoV-2 and stroke presuppose  
95 the need to include it as a new risk factor in the list for cerebrovascular disease?". The  
96 protocol of this study was registered in the International Prospective Register of Systematic  
97 Reviews, under number CRD42022323750.

## 98 **Search Strategy**

99 Studies published in English, Spanish, or Portuguese, from March 2020 to March  
100 2023, that address the association between COVID-19 and ischemic or hemorrhagic stroke,  
101 small or large vessels, in any age group, were selected. The databases consulted were  
102 PubMed/MEDLINE, LILACS, Scopus, and Web of Science. The search strategy used a  
103 strategic combination of terms and keywords in all three languages. The terms used were:  
104 "Stroke", "COVID-19", "Neurological Complications", "Systematic review";  
105 "Cerebrovascular Accident", "COVID-19", "Neurological Complications", "Systematic  
106 Review"; "Stroke", "COVID-19", "Neurological Complications", "Systematic Review"

107 To complement and broaden the search, the following terms were used in different  
108 combinations, using Boolean operators to improve the results: (STROKE\* OR  
109 CEREBROVASCULAR\* OR NEUROLOGICAL\*) AND (COVID\* OR SARS-CoV-2\*)  
110 AND (SYSTEMATIC\* AND REVIEW\*); (("Stroke" OR "Stroke") AND ("systematic  
111 review" OR "systematic review" OR "systematic review")) AND ("SARS-CoV-2").

## 112 **Selection criteria**

113 Scientific articles were selected that include systematic reviews, systematic reviews  
114 with meta-analysis of case studies, case series, case-control studies and, preferably,  
115 randomized and prospective and retrospective cohort studies. Reviews that were not available  
116 in full, incomplete manuscripts, studies outside the context of systematic review, and non-  
117 original research articles, such as editorial comments, opinion articles, letters, protocols,  
118 reports, and book chapters, were excluded. Also excluded were reported non-clinical features,  
119 such as non-neurological complications, as well as studies that presented a diagnosis of  
120 COVID-19 without any reports of stroke as a complication.

## 121 **Data extraction**

122 The selection of articles was carried out by two independent reviewers (AMLBS and  
123 EFA) in two stages. First, the titles and abstracts were independently evaluated, and any  
124 disagreements were resolved by consensus. Then, the full text of the selected articles was  
125 analyzed in the same way, with consensus being used to resolve disagreements.

126 The agreement between the reviewers was assessed using Cohen's Kappa coefficient<sup>27</sup>.  
127 In the screening phase of titles and abstracts, the Kappa coefficient was 0.62511, indicating a  
128 substantial agreement among the reviewers. This result suggests that the selection criteria  
129 were well defined and understood, resulting in a consistent initial selection of studies.

130 The use of the Covidence<sup>28</sup> software brought significant benefits to the review process,  
131 facilitating the organization and analysis of the data, including the calculation of the Kappa  
132 index and the generation of the PRISMA flowchart. This online tool allowed for real-time  
133 collaboration between reviewers, simplifying the resolution of disagreements and ensuring the  
134 transparency of the process.

## 135 **Quality assessment**

136 The methodological quality of systematic reviews was assessed using the ROBIS<sup>29</sup>  
137 tool, a validated and widely used instrument to assess the risk of bias in systematic reviews in  
138 healthcare. The ROBIS tool is especially useful for evaluating reviews that address  
139 interventions, diagnosis, prognosis, and etiology, and is therefore suitable for the scope of this  
140 study.

141 The evaluation process with the ROBIS tool is divided into three main phases: Phase  
142 1: Assessment of the relevance of the systematic review to the research question. In this step,

143 it is verified whether the selected systematic review directly addresses the research question  
144 of the Umbrella Review.

145 Phase 2: Identification of concerns with the systematic review process. This phase  
146 investigates four critical domains that may be sources of bias: Study eligibility criteria:  
147 Evaluates whether the inclusion and exclusion criteria of the primary studies were adequate  
148 and well-defined. Identification and selection of studies: Analyzes the search and selection  
149 process of studies, checking whether there was a risk of publication bias. Data collection and  
150 study evaluation: Examines the quality of data collection and the assessment of risk of bias in  
151 primary studies. Synthesis and findings: Evaluates the presentation and synthesis of the  
152 results, considering the heterogeneity between the studies.

153 Phase 3: Judging the overall risk of bias for the systematic review. Based on the analyses  
154 of the previous phases, the overall risk of bias of the systematic review is classified as low,  
155 high, or unclear.

## 156 **Data analysis**

157 Initially, for each identified factor, being evaluated in more than one individual study,  
158 we performed a separate random-effects meta-analysis to obtain a pooled estimate of the  
159 effect size, which we assumed would follow a normal distribution with variance equal to the  
160 sum of the weights of the studies<sup>30</sup> (method of DerSimonian and Laird, 1986). The results of  
161 the meta-analyses were the effect sizes with their corresponding 95% confidence intervals  
162 (95% CI) and p-values, as well as the statistics needed to assess the level of evidence. We  
163 used the effect size measure used in each original meta-analysis (i.e., RR, OR, or SMD) and  
164 calculated the OR equivalents (eOR) for all effect size statistics.

165 We evaluated the heterogeneity between studies with the  $I^2$  index<sup>31</sup>.  $I^2$  values > 50%  
166 indicated great heterogeneity<sup>33</sup>. We also assessed whether there was evidence of effects from  
167 small studies using the Egger test<sup>33</sup>, where statistical significance would mean potential  
168 publication bias<sup>34</sup>.

169 In addition, a rating system for the strength of evidence was used, which has been  
170 widely used in previous umbrella reviews<sup>35,36</sup>. Specifically, we classified the levels of  
171 evidence of the significant associations between each factor into convincing evidence (class  
172 I), highly suggestive (class II), suggestive (class III), or weak evidence (class IV). Convincing  
173 evidence would require a number  $\geq 10$  studies, a number of cases  $\geq 500$ ,  $I^2 \leq 50\%$ , and no

174 signs of influence of small studies in the meta-analysis (Egger test  $\geq 0.10$ ). The suggestive  
175 evidence required a number  $\geq 10$  studies, a number  $\geq 400$  cases, an Egger test with a p-value  
176  $\geq 0.10$ , and  $I^2 \leq 50\%$ . Weak evidence with a case count  $\geq 300$ , Egger's test with a P-value  $\geq$   
177  $0.10$ ,  $I^2 \leq 75\%$ , and very weak evidence did not require a specific number of cases and  
178  $p < 0.05$ .

179 Finally, the meta-analyses were repeated estimating heterogeneity with the Hartung-  
180 Knapp-Sidik-Johkman method for random effects. This method estimates variance as the  
181 weighted mean square error divided by degrees freedom and assumes a distribution t<sup>37,38,39</sup>.  
182 The main difference between a normal distribution and a distribution t is that in the former,  
183 we assume that we can know variance, while in the latter, we do not make this assumption, as  
184 indeed is the case. This difference can be negligible when the number of studies is large, but it  
185 can be relevant when the number of studies is small. All analyses were performed with  
186 version 1.0.11 of the metaumbrella package, implemented in R environment.

## 187 **Results**

### 188 **Identification and Selection of Studies**

189 From an initial search in databases and registries, 2,490 studies relevant to the  
190 investigation of the association between COVID-19 and stroke were identified. After  
191 removing 1,289 duplicate references, 1,201 studies went through the screening process. Of  
192 these, 141 were excluded because they did not meet the relevance criteria, focusing mainly on  
193 management or medications, which was not the focus of this study. This resulted in the  
194 detailed evaluation of 1,060 studies for their eligibility.

195 Of these 1,060 studies, 1,026 were excluded for various reasons, including focusing on  
196 non-neurological manifestations of COVID-19, specific non-pertinent populations, medical  
197 conditions unrelated to COVID-19, inadequate methodologies, or unrelated interventions.

198 At the end of this process, 34 studies were considered eligible. Of these, four studies  
199 were selected for analysis in the metaumbrella, based on high methodological quality and  
200 consistency with the established criteria (Figure 1).

201

202

203

204

205

206

207

208

209

210

211

212

213

214

215

216

217

218

219

220

221

222

223

224

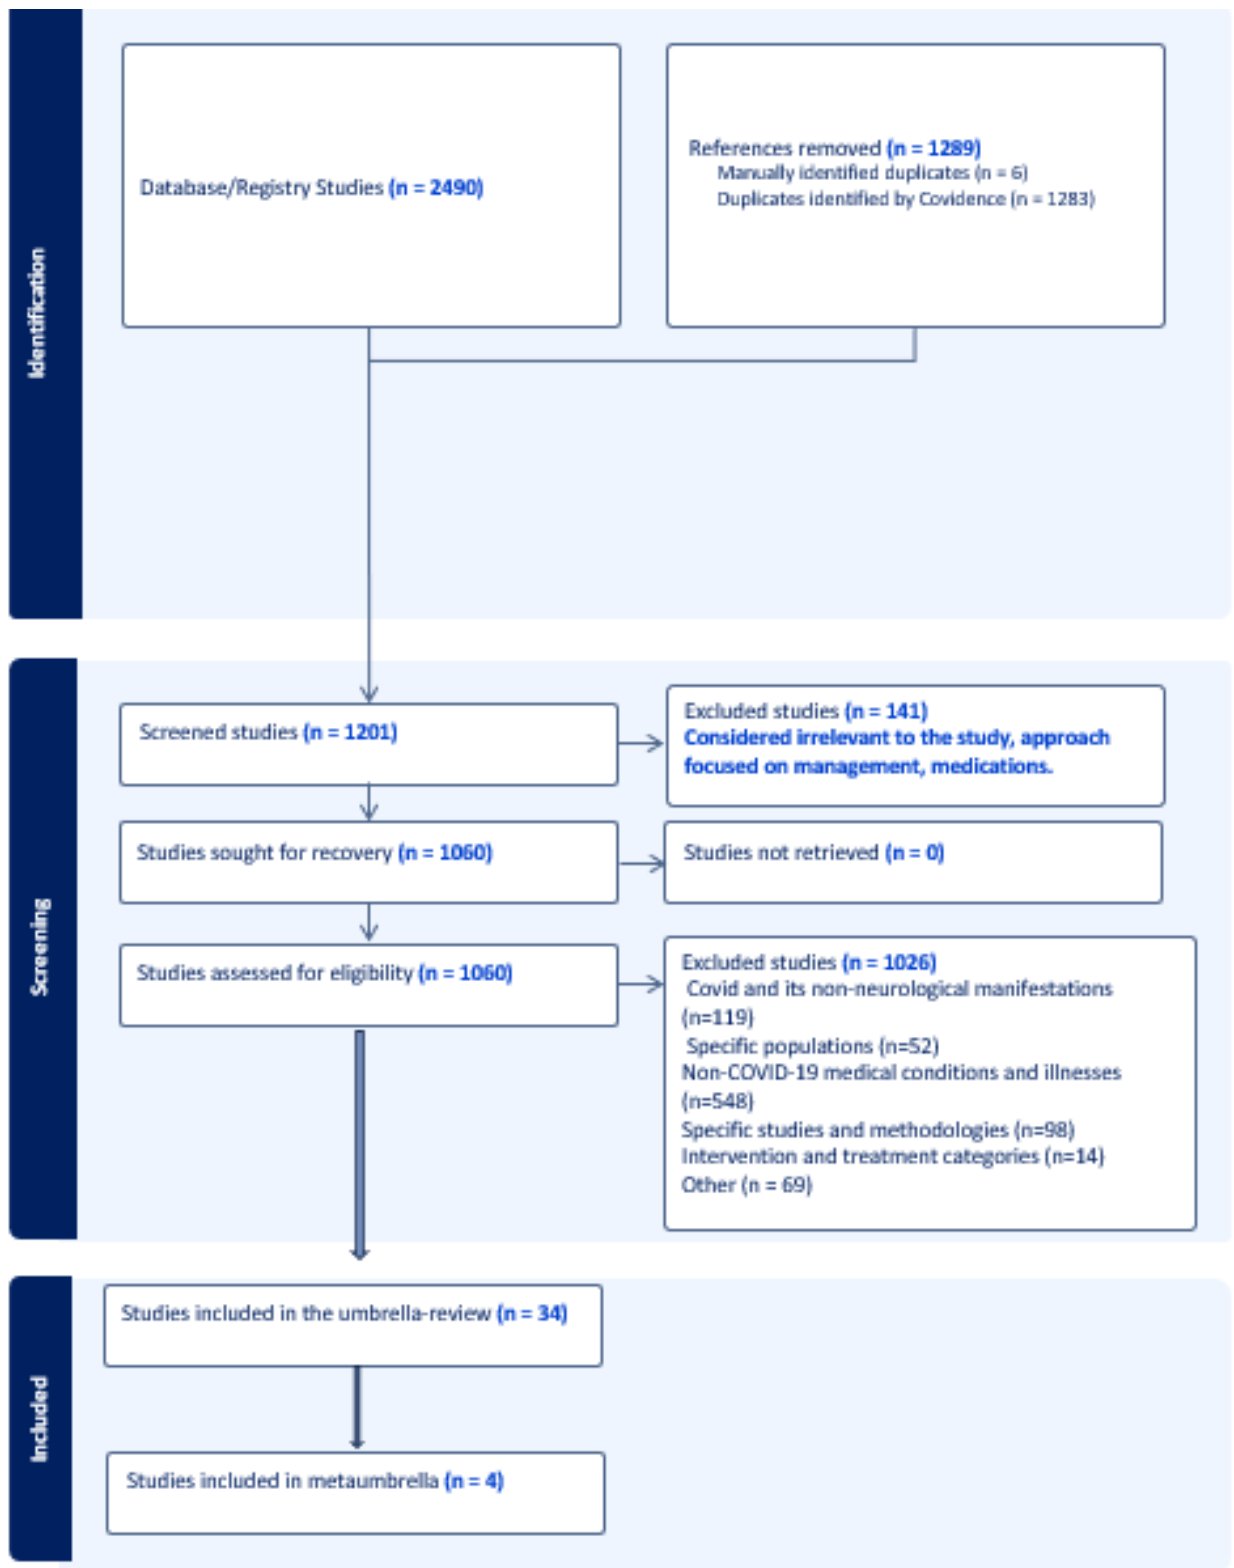

225 Figure 1- Prism

226 **Characteristics of the Included Studies**



227 The main characteristics of the 34 studies initially found demonstrate an important  
 228 cohesion in the demographic and geographic profiles of the patients evaluated. The mean age  
 229 of the patients was 61.2 years, which indicates that the study population consisted  
 230 predominantly of individuals in an age group at higher risk for stroke. In addition, there was a  
 231 clear predominance of males, with an average of 59.9% of participants being men. This  
 232 disparity may be associated with men's greater susceptibility to developing severe forms of  
 233 COVID-19 and its complications, including stroke.

234 Geographically, the studies were conducted in a variety of countries, reflecting the  
 235 global spread of the pandemic. Among the most frequently cited places are the United States,  
 236 Italy, India, Brazil, and Spain, with particular emphasis on China. This country has emerged  
 237 as the most frequently represented location, possibly due to the initial and significant impact  
 238 of the COVID-19 pandemic on its territory, which has led to increased production of data and  
 239 studies on the neurological complications associated with SARS-CoV-2.

240 **Risk of Bias Assessment**

241 Figure 2 shows the evaluation of the methodological quality of the 34 studies included  
 242 in the umbrella review, using the ROBIS tool. Most studies were at low risk of bias in criteria  
 243 such as eligibility, identification and selection of studies, and data collection. However, some  
 244 studies have shown uncertain or high risks, particularly in the selection of studies and the  
 245 synthesis of results.

246 Among the four studies selected for the meta-umbrella, the assessment of bias was  
 247 predominantly favorable, with all being classified as low risk in terms of overall bias.

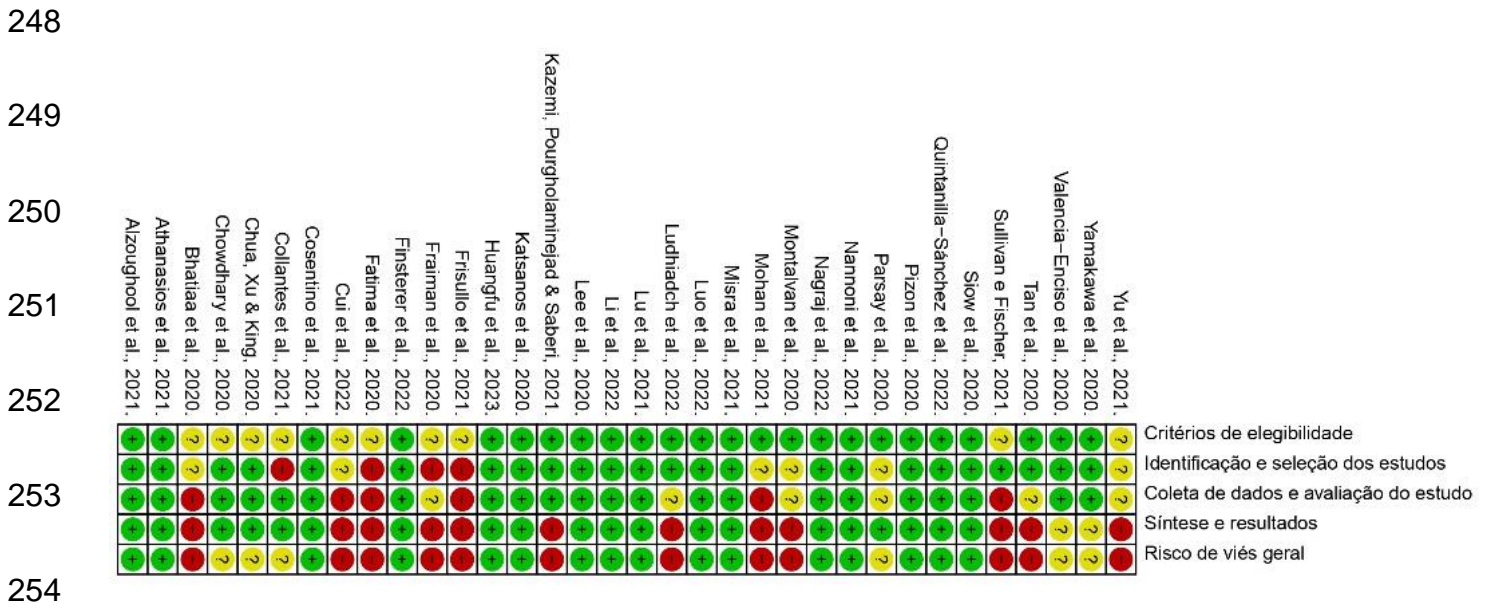



255

256

257

258

259

260

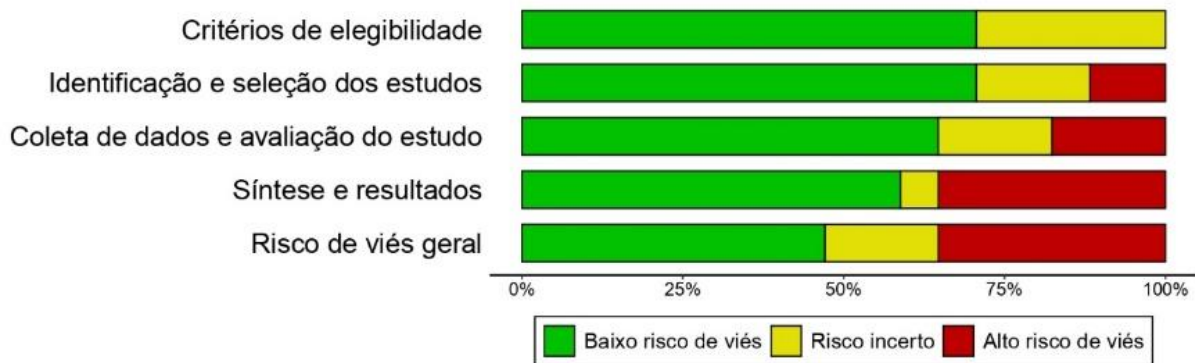

261 Figure 2 - Quality of the ROBIS studies.

## 262 **Metaumbrella Results**

263 The results of the metaumbrella (Figure 3), which included four systematic reviews with  
264 meta-analysis, covered a total of 70 primary studies that evaluated the association between  
265 COVID-19 and stroke in five different study subjects. These objects of study were:

266 1. "COVID-19 severity and stroke risk": The meta-analysis showed that there is a significant  
267 association between COVID-19 severity and increased stroke risk, with an odds ratio (eOR)  
268 of 2.48 (95% CI: 1.55 – 3.95). This indicates that patients with severe COVID-19 are  
269 significantly more likely to develop stroke compared to those with less severe forms of the  
270 disease.

271 2. "COVID-19 and ischemic stroke risk": A significant association was found between  
272 COVID-19 and a higher risk of ischemic stroke, with an eOR of 1.76 (95% CI: 1.11 – 2.80).  
273 This suggests that COVID-19 infection may be a risk factor for developing ischemic stroke.

274 3. "COVID-19 and hemorrhagic stroke risk": The analysis also revealed an association  
275 between COVID-19 and increased risk of hemorrhagic stroke, with an eOR of 3.86 (95% CI:  
276 1.79 – 8.33). This finding indicates that, in addition to ischemic stroke, COVID-19 may also  
277 be related to an increased risk of hemorrhagic stroke.

278 4. "Cerebrovascular comorbidity and mortality in patients with COVID-19": Patients with  
279 cerebrovascular comorbidity who contracted COVID-19 had a higher mortality compared to  
280 those who did not have a stroke, with an eOR of 2.48 (95% CI: 2.48 – 19.63). This result

281 highlights the adverse impact of pre-existing cerebrovascular conditions on the survival of  
282 COVID-19 patients.

283 5. "COVID-19 and stroke mortality": Mortality was significantly higher among COVID-19  
284 patients who already had a history of stroke, with an eOR of 6.08 (95% CI: 3.73 – 9.91). This  
285 data underlines the severity of the impact of COVID-19 on patients who had already suffered  
286 a stroke before.

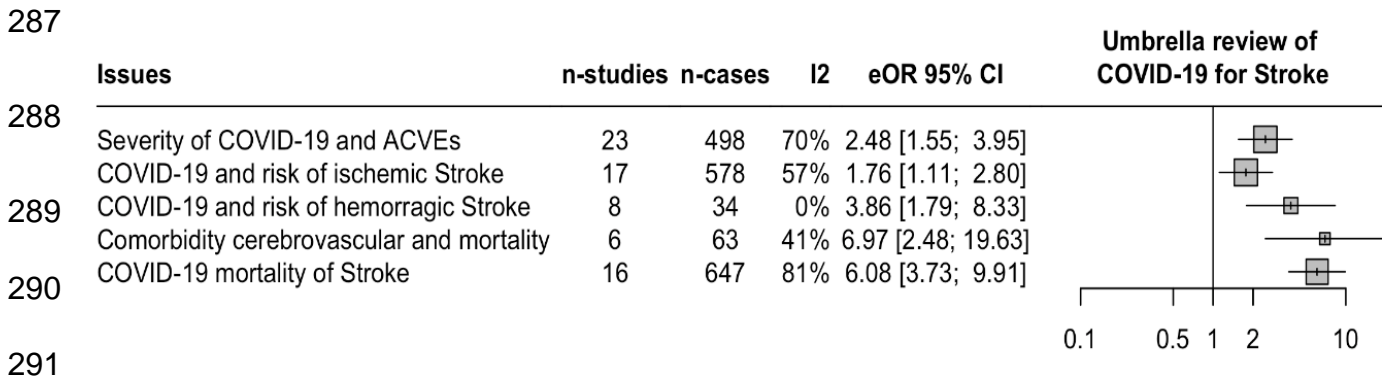

292 **Figure 3.** Meta Umbrella showing the association between COVID-19 and stroke

293 In addition to these results, an overlap of two primary studies (Qureshi<sup>40</sup> and Merkle<sup>41</sup>)  
294 was observed (Figure 4) in three distinct systematic reviews (Cui 2022<sup>42</sup>, Huangfu 2023<sup>43</sup>,  
295 and Quintanilla-Sánchez 2022)<sup>44</sup>. The overlap of these studies in the different reviews  
296 indicates that they are important and frequently cited references in the literature on the  
297 relationship between COVID-19 and stroke. These findings reinforce the strong association  
298 between COVID-19 infection and the risk of different types of strokes, as well as highlight  
299 the higher mortality associated with stroke in patients with COVID-19.

300

| Study             | Systematic Review        |                    |                       |                                   |
|-------------------|--------------------------|--------------------|-----------------------|-----------------------------------|
|                   | Alzoughool<br>2020, N=13 | Which<br>2022, N=4 | Huangfu<br>2023, N=16 | Quintanilla-Sánchez<br>2022, N=37 |
| Annon             | -                        | -                  | +                     | -                                 |
| Al-Samkari et al. | -                        | -                  | -                     | +                                 |
| Benussi           | -                        | +                  | -                     | -                                 |
| Chen Lin          | -                        | -                  | +                     | -                                 |
| Chen T            | +                        | -                  | -                     | -                                 |
| Chen TL           | +                        | -                  | -                     | -                                 |

|                    |   |   |   |   |
|--------------------|---|---|---|---|
| Chougar et al.     | - | - | - | + |
| Eric Jorge         | - | - | + | - |
| Garcia-Moncó       | - | - | - | + |
| Guan W             | + | - | - | - |
| Guan WI            | + | - | - | - |
| Guan WJ            | + | - | - | - |
| Helms              | - | + | - | - |
| Hu L               | + | - | - | - |
| Jeffrey            | - | - | + | - |
| Martí-Fábregas     | - | - | + | - |
| Kimón Bekelis      | - | - | + | - |
| Kremer             | - | - | - | + |
| She S              | + | - | - | - |
| Li, Li & Wang      | - | - | - | + |
| Litton & It's Good | - | - | - | + |
| Lodigiani          | - | - | - | + |
| Ludovico Ciolli    | - | - | + | - |
| M Mehrpour 1       | - | - | + | - |
| Makda              | - | - | - | + |
| Mandip S. Dhamoo   | - | - | + | - |
| Merkler            | - | + | - | + |
| Minghuan Wang      | - | - | + | - |
| Naval-Baudin       | - | - | + | - |
| Peterson & Brown   | - | - | - | + |
| Qin C              | + | - | - | - |
| Qureshi            | - | + | + | - |
| Rifino             | - | - | - | + |
| Rohit Bhatia       | - | - | + | - |
| Romero-Sánchez     | - | - | - | + |
| Seby John          | - | - | + | - |
| Shadi Yagh         | - | - | + | - |

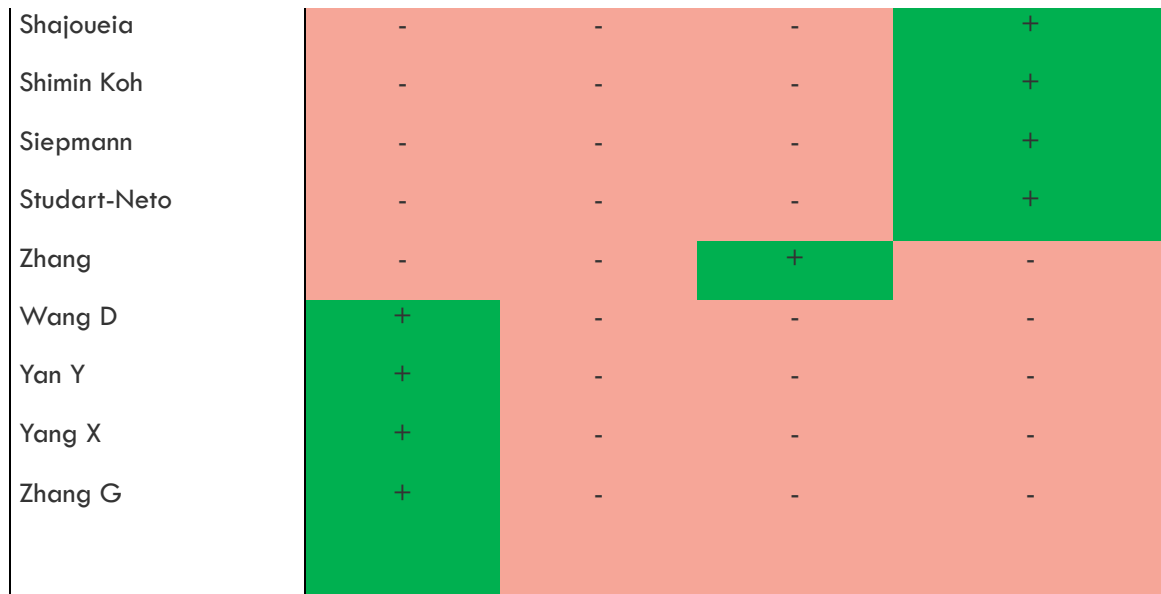

301 **Figure 4.** Matrix of overlapping studies in the systematic review.

302 **Analysis of heterogeneity and bias**

303 Table 1, which presents the metaumbrella stratified by the classification of the  
 304 evidence, it was observed that two of the study objects showed low heterogeneity, with  $I^2$   
 305 values below 50%. This indicates that the variability between the studies included in these  
 306 study objects was relatively low, suggesting a greater consistency in the results. In particular,  
 307 the "Severity of COVID-19 and stroke" and "Cerebrovascular comorbidities and mortality"  
 308 demonstrated this characteristic of low heterogeneity, which strengthens confidence in the  
 309 interpretation of the observed effects.

310 None of the study subjects analyzed showed the effect of small studies, as indicated by  
 311 the non-significant values of the Egger test (Egger p). This suggests that the results of the  
 312 meta-analyses were not significantly influenced by smaller studies, which could skew the  
 313 conclusions.

314 However, two study subjects showed excess significance bias (ESB), which was  
 315 identified by significant p-values: "COVID-19 and stroke mortality" ( $p = 0.0252$ ) and  
 316 "COVID-19 and risk of ischemic stroke" ( $p = 0.0159$ ). This bias occurs when there is an  
 317 excessive number of studies with positive results relative to what would be expected by the  
 318 normal distribution of true effects, indicating that findings in these domains should be  
 319 interpreted with caution.

320

321

322

323

324 Table 1. Total participants and P values from the Egger and JK test

| Object of study                             | Number of patients | Number of Cases | Number of Controls | Egger p  | ESB p     |
|---------------------------------------------|--------------------|-----------------|--------------------|----------|-----------|
| COVID-19 Severity and LVCAs                 | 15279              | 498             | 14781              | 8.45E-01 | 5.14E-01  |
| COVID-19 and ischemic stroke risk           | 36154              | 578             | 35576              | 2.84e-01 | 1.59e-02  |
| COVID-19 and hemorrhagic stroke risk        | 1303               | 34              | 1269               | 1.81e-01 | 7.31e-01  |
| Cerebrovascular comorbidities and mortality | 2271               | 63              | 2208               | 8.07e-01 | 9.56e-01  |
| COVID-19 and stroke mortality               | 4781               | 647             | 4134               | 1.10e-01 | 0.252e-02 |

325 Egger p = Egger's test for bias due to the influence of small studies

326 ESB p = test for bias due to Statistical Excess Significance.

327 The five study objects evaluated had a statistically significant effect size ( $p < 0.05$ ),  
328 which reinforces the validity of the findings. However, based on the criteria previously  
329 established for the classification of evidence, three of these study objects were classified as  
330 having weak evidence. This reflects limitations such as possible biases or inconsistencies in  
331 the results, suggesting the need for further studies to confirm these associations.

332 Figure 5 complements this information by stratifying the metaumbrella by the  
333 classification of evidence, visually highlighting the relative robustness of each object of study.  
334 This detailed analysis allows for a more nuanced understanding of the effects of COVID-19 in  
335 relation to stroke, while identifying areas where the evidence is weaker and where future  
336 studies could be more informative.

337

338

339

340

341

342

343

344

345

346

347

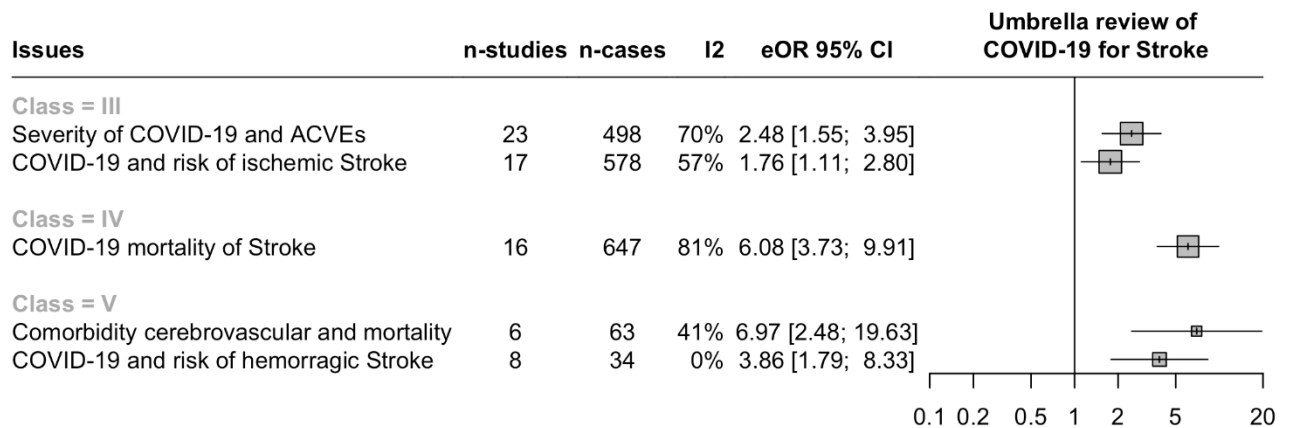

348 **Figure 5.** Umbrella Goal stratified by Evidence Classification.

### 349 Discussion

350 This study started from the hypothesis that SARS-CoV-2 infection is associated with  
 351 increased risk of stroke and sought to answer the guiding question: "Does the association  
 352 between SARS-CoV-2 and stroke presuppose the need to include it as a new risk factor in the  
 353 list for cerebrovascular disease?" since it proposes to deepen the understanding of the  
 354 influence of COVID-19 on stroke risk, a global public health problem that is among the main  
 355 causes of death and disability<sup>45,46</sup>.

356 A point to consider is the incidence of stroke in patients with COVID-19, which is  
 357 significantly higher than in patients infected with other coronaviruses, suggesting a specific  
 358 pathological mechanism associated with SARS-CoV-2 that predisposes to stroke<sup>47</sup>.

359 The meta-umbrella methodology used in this study offers significant advantages over  
 360 individual systematic reviews. The comprehensive analysis of multiple meta-analyses,  
 361 considering the overlap of primary studies, as exemplified by the inclusion of the study by  
 362 Qureshi<sup>40</sup>, Merkler<sup>41</sup> in different analyses, ensures greater robustness and reliability of the  
 363 results. The convergence of evidence from multiple sources, confirming the association  
 364 between COVID-19 and different stroke subtypes, as well as associated mortality, strengthens  
 365 the conclusion that COVID-19 represents an independent risk factor for stroke.

366 The finding of a link between COVID-19 and increased risk of stroke, especially the  
 367 ischemic type, corroborates the literature that points to prothrombotic mechanisms induced by  
 368 the virus<sup>11,12,14</sup>. Among these mechanisms, SARS-CoV-2 infection stands out, which triggers



369 an acute inflammatory response that can result in endothelial dysfunction and a prothrombotic  
370 state<sup>42</sup>.

371 COVID-19 is associated with a state of hypercoagulability, increasing the risk of blood  
372 clots forming that can obstruct blood vessels in the brain, leading to stroke. SARS-CoV-2 can  
373 directly damage endothelial cells, which line blood vessels, making them more prone to the  
374 formation of these clots<sup>48,49</sup>. The high incidence of thrombotic complications in patients with  
375 severe COVID-19 reinforces the link between coagulation and viral infection, consolidating  
376 the relevance of the findings of this study.

377 The identification of SARS-CoV-2 as a risk factor for stroke has crucial implications  
378 for the prevention, diagnosis, and treatment of this condition<sup>50</sup>. It is essential to integrate this  
379 information into clinical practice, adopting measures such as: monitoring patients with  
380 COVID-19 for neurological symptoms, especially those at high risk of stroke, considering  
381 prophylactic anticoagulation in patients with COVID-19 and high risk of thromboembolic  
382 events, implementing screening protocols for stroke in patients hospitalized with COVID-19,  
383 especially in those with additional risk factors for cerebrovascular diseases<sup>51</sup>.

384 Some limitations should be considered, such as the heterogeneity in the diagnostic  
385 criteria for stroke among the studies, the variability in the sample size, and the inadequate  
386 control of confounding factors, such as hypertension and diabetes.

387 Future prospective, multicenter studies are essential to investigate the mechanisms  
388 underlying the association between COVID-19 and stroke in greater depth, to develop  
389 comprehensive clinical guidelines for the management of patients with COVID-19 and stroke  
390 risk, and to evaluate the efficacy of preventive interventions, such as anticoagulation, in  
391 reducing the incidence of stroke in patients with COVID-19.

## 392 **Conclusion**

393 The association between SARS-CoV-2 and stroke was consistent and significant,  
394 suggesting that COVID-19 should be considered a new risk factor for cerebrovascular  
395 diseases. However, the high heterogeneity among the studies analyzed reinforces the need for  
396 further research to consolidate this relationship.

## 397 **Conflict of Interest Statement**

398 The author(s) declared that there are no potential conflicts of interest with respect to the  
399 research, authorship and/or publication of this article.

400

401 Financing

402 The author(s) did not receive financial support for the research, authorship and/or publication  
403 of this article.

## 404 **References**

- 405 1. World Health Organization. The top ten causes of death [Internet]. 2019 [cited 2024  
406 Sep 20]. Available from: [https://www.who.int/news-room/fact-sheets/detail/the-top-](https://www.who.int/news-room/fact-sheets/detail/the-top-10-causes-of-death)  
407 [10-causes-of-death](https://www.who.int/news-room/fact-sheets/detail/the-top-10-causes-of-death)
- 408 2. Santos D, Marques G, Almeida L, et al. Stroke as a complication of COVID-19  
409 infection [Internet]. 2021 [cited 2024 Sep 20]. Available from:  
410 <https://doi.org/10.51249/easn01.2021.12>
- 411 3. Sirisha S, et al. Conscientização, reconhecimento e resposta ao AVC entre o público  
412 em geral – um estudo observacional. J Neurosci Rural Pract. 2021;12(4):704.  
413 doi: [10.1055/s-0041-1735822](https://doi.org/10.1055/s-0041-1735822)
- 414 4. Cui Q, Naikoo NA. Modifiable and non-modifiable risk factors in ischemic stroke: a  
415 meta-analysis. Afr Health Sci. 2019 Jun;19(2):2121-9. DOI: [10.4314/ahs.v19i2.36](https://doi.org/10.4314/ahs.v19i2.36).  
416 PMID: 31656496; PMCID: PMC6794552.
- 417 5. Choudhury MS, Chowdhury Md, Nayeem A, et al. Modifiable and Non-Modifiable  
418 Risk Factors of Stroke: A Review Update. J Natl Inst Neurosci Bangladesh. 2015;  
419 1:22. [https://doi: 10.3329/jninb.v1i1.22944](https://doi.org/10.3329/jninb.v1i1.22944).
- 420 6. Zhou P, et al. A pneumonia outbreak associated with a new coronavirus of probable  
421 bat origin. Nature. 2020. Available from: <https://doi.org/10.1038/s41586-020-2012-7>
- 422 7. Gorbalenya AE. Severe acute respiratory syndrome-related coronavirus – the species  
423 and its viruses, a statement of the Coronavirus Study Group. bioRxiv. 2020. Available  
424 from: <https://doi.org/10.1101/2020.02.07.93786>
- 425 8. Zhu N, et al. A novel coronavirus of pneumonia patients in China, 2019. N Engl J  
426 Med. 2020; 382:727-33. <https://doi.org/10.1056/nejmoa2001017>
- 427 9. Qi X, Keith KA, Huang JH. COVID-19 and stroke: A review. Brain Hemorrhages.  
428 2021 Jun;2(2):76-83. doi: 10.1016/j.hest.2020.11.001. Epub 2020 Nov 17. PMID:  
429 33225251; PMCID: PMC7670261.
- 430 10. Bass DI, Meyer RM, Barros G, et al. The impact of the COVID-19 pandemic on  
431 cerebrovascular disease. Semin Vasc Surg. 2021 Jun;34(2):20-7. doi:  
432 [10.1053/j.semvascsurg.2021.05.001](https://doi.org/10.1053/j.semvascsurg.2021.05.001). Epub 2021 May 20. PMID: 34144743; PMCID:  
433 PMC8136291.

- 434 11. Lashkari A, Ranjbar R. A case-based systematic review on the SARS-COVID-2-  
435 associated cerebrovascular diseases and the possible virus routes of entry. J  
436 Neurovirol. 2021 Oct;27(5):691-701. doi: 10.1007/s13365-021-01013-8. Epub 2021  
437 Sep 21. PMID: 34546547.
- 438 12. Stein LK, Mayman NA, Dhamoon MS, et al. The emerging association between  
439 COVID-19 and acute stroke. Trends Neurosci. 2021;44(7):527-37. Available from:  
440 <https://doi.org/10.1016/j.tins.2021.03.005>
- 441 13. Tsivgoulis G. Epidemiology of ischemic stroke during the COVID-19 pandemic:  
442 navigating uncharted waters with tidal changes. Stroke. 2020; 51:1924-6.  
443 <https://doi.org/10.1161/strokeaha.120.030791>
- 444 14. Vogrig A, Bagatto D, Gigli GL, et al. Causality in COVID-19-associated stroke: a  
445 uniform case definition for use in clinical research. J Neurol. 2021;268(3):758-61.  
446 Available from: <https://doi.org/10.1007/s00415-020-10103-2>
- 447 15. John S, Kesav P, Mifsud VA, et al. Characteristics of Large-Vessel Occlusion  
448 Associated with COVID-19 and Ischemic Stroke. AJNR Am J Neuroradiol. 2020  
449 Dec;41(12):2263-8. doi: 10.3174/ajnr.A6799. Epub 2020 Aug 27. PMID: 32855182;  
450 PMCID: PMC7963240.
- 451 16. Jillella DV, Janocko NJ, Nahab F, et al. Ischemic stroke in COVID-19: An urgent need  
452 for early identification and management. PLoS One. 2020;15(9).  
453 <https://doi.org/10.1371/journal.pone.0239443>
- 454 17. Belani P, Schefflein J, Kihira S, et al. COVID-19 is an independent risk factor for  
455 acute ischemic stroke. Am J Neuroradiol. 2020;41(8):1361-4.  
456 <https://doi.org/10.3174/ajnr.a6650>
- 457 18. Lee KW, Yusof Khan A, Ching SM, et al. Stroke and novel coronavirus infection in  
458 humans: A systematic review and meta-analysis. Front Neurol. 2020;11.  
459 <https://doi.org/10.3389/fneur.2020.579070>
- 460 19. Avula A, Nalleballe K, Narula N, et al. COVID-19 presenting as stroke. Brain Behav  
461 Immun. 2020; 87:115-9. <https://doi.org/10.1016/j.bbi.2020.04.077>
- 462 20. Pollock M, Fernandes RM, Becker LA, et al. Overview of revisions. Cochrane Handb  
463 Rev Interv Syst Version. 2018;6. Available from:  
464 <https://training.cochrane.org/handbook/current/chapter-v>
- 465 21. Smith V, Devane D, Begley CM, et al. Methodology in conducting a systematic  
466 review of systematic reviews of health interventions. BMC Med Res Methodol.  
467 2011;11(1):15.
- 468 22. Aromataris E, Fernandez R, Godfrey CM, et al. Summarizing systematic reviews:  
469 methodological development, conduct and reporting of an umbrella review approach.  
470 Int J Evid Based Healthc. 2015 Sep;13(3):132-40. doi:  
471 10.1097/XEB.0000000000000055. PMID: 26360830.

- 472 23. Donato H, Donato M. Revisão de revisões: Guia passo a passo. Porto Acta Med  
473 [Internet]. 2024 Jul 1 [cited 2024 Sep 20];37(7-8):547-55. Available from:  
474 <https://actamed.com/re/indice.php/amp/artigo/visualizar/21796>
- 475 24. Hunt H, Pollock A, Campbell P, et al. An introduction to reviews overviews: planning  
476 a relevant and objective research question for an overview. Syst Rev. 2018; 7:39.  
477 Available from: <https://doi.org/10.1186/s13643-018-0695-8>
- 478 25. Becker LA, Oxman AD. Chapter 22: Overview of Revisions. In: Higgins JPT, Green  
479 S, editors. Cochrane Handbook for Systematic Reviews of Interventions. Version 5.1.0  
480 [updated 2011 Mar]. The Cochrane Collaboration; 2011 [cited 2024 Sep 20]. Available  
481 from: <http://training.cochrane.org/handbook>
- 482 26. Deeks JJ, Bossuyt PM, Gatsonis C, editors. Cochrane Handbook for Systematic  
483 Reviews of Diagnostic Test Accuracy. Version 0.9. The Cochrane Collaboration; 2013.  
484 Available from: <http://methods.cochrane.org/sdt/handbook-dta-reviews>
- 485 27. Oliveira NS, Oliveira JM, Bergamaschi DP. Inter-raters' agreement in the selection of  
486 articles in systematic reviews. Rev Bras Epidemiol. 2006; 9:309-15.
- 487 28. Covidence systematic review software. Veritas Health Innovation, Melbourne,  
488 Australia. Available from: [www.covidence.org](http://www.covidence.org)
- 489 29. Whiting P, et al. ROBIS: a new tool to assess the risk of bias in systematic reviews has  
490 been developed. J Clin Epidemiol. 2016;69. <https://doi.org/10.1016/j.jclinepi.2015.06.005>
- 491 30. DerSimonian R, Laird N. Meta-analysis in clinical trials. Control Clin Trials. 1986;  
492 7:177-88. Available from: [https://doi.org/10.1016/0197-2456\(86\)90046-2](https://doi.org/10.1016/0197-2456(86)90046-2)
- 493 31. Ioannidis JPA, Trikalinos TA. An exploratory test for an excess of significant findings.  
494 Clin Trials. 2007; 4:245-53. Available from:  
495 <https://doi.org/10.1177/1740774507079441>
- 496 32. Higgins JPT, Green S. Cochrane Handbook for Systematic Reviews of Interventions.  
497 Version 5.1.0. Cochrane Handbook for Systematic Reviews of Interventions. Version  
498 5.1.0. <https://handbook-5-1.cochrane.org/>
- 499 33. Egger M, Davey Smith G, Schneider M, et al. Bias in meta-analysis detected by a  
500 simple, graphical test. BMJ. 1997; 315:629-34. Available from:  
501 <https://doi.org/10.1136/bmj.316.7129.469>
- 502 34. Sterne JAC, Sutton AJ, Ioannidis JPA, et al. Recommendations for examining and  
503 interpreting funnel plot asymmetry in meta-analyses of randomised controlled trials.  
504 BMJ. 2011;343. Available from: <https://doi.org/10.1136/bmj.d4002>
- 505 35. Fusar-Poli P, Radua J. Ten simple rules for conducting umbrella reviews. Evid Based  
506 Ment Health. 2018; 21:95-100. Available from: [https://doi.org/10.1136/ebmental-  
507 2018-300014](https://doi.org/10.1136/ebmental-2018-300014)

- 508 36. Ioannidis JPA. Integration of evidence from multiple meta-analyses: a primer on  
509 umbrella reviews, treatment networks and multiple treatments meta-analyses. *CMAJ*.  
510 2009; 181:488-93. Available from: <https://doi.org/10.1503/cmaj.081086>
- 511 37. Hartung J. An alternative method for meta-analysis. *Biom J*. 1999;901-16.
- 512 38. IntHout J, Ioannidis JP, Borm GF. Obtaining evidence by a single well-powered trial  
513 or several modestly powered trials. *Stat Methods Med Res*. 2016;25(2):538-52.
- 514 39. Sidik K, Jonkman JN. Robust variance estimation for random-effects meta-analysis.  
515 *Comput Stat Data Anal*. 2006;50(12):3681-701. doi: 10.1016/j.csda.2005.07.019
- 516 40. Qureshi AI, Baskett WI, Huang W, et al. Acute ischemic stroke and COVID-19: an  
517 analysis of 27 676 patients. *Stroke*. 2021;52(3):905-12.  
518 <https://doi.org/10.1161/strokeaha.120.031786>
- 519 41. Alzoughool F, Alanagreh L, Abumweis S, et al. Cerebrovascular comorbidity, high  
520 blood levels of C-reactive protein and D-dimer are associated with disease outcomes  
521 in COVID-19 patients. *Clin Hemorheol Microcirc*. 2021;77(3):311-22.  
522 <https://doi.org/10.3233/ch-201002>. PMID: 33185593.
- 523 42. Cui Y, Zhao B, Li T, et al. Risk of ischemic stroke in patients with COVID-19  
524 infection: a systematic review and meta-analysis. *Brain Res Bull*. 2022 Mar; 180:31-7.  
525 doi: 10.1016/j.brainresbull.2021.12.011. Epub 2021 Dec 31. PMID: 34979237;  
526 PMCID: PMC8719366.
- 527 43. Huangfu X, Li X, Chen M, et al. A meta-analysis of the impact of COVID-19 on  
528 stroke mortality. *Chin Gen Pract*. 2023;26(3):348. [https://doi.org/10.12114/j.issn.1007-](https://doi.org/10.12114/j.issn.1007-9572.2022.0480)  
529 [9572.2022.0480](https://doi.org/10.12114/j.issn.1007-9572.2022.0480)
- 530 44. Quintanilla-Sánchez C, Salcido-Montenegro A, González-González JG, et al. Acute  
531 cerebrovascular events in severe and non-severe COVID-19 patients: a systematic  
532 review and meta-analysis. *Rev Neurosci*. 2022 Feb 10;33(6):631-9. doi:  
533 10.1515/revneuro-2021-0130. PMID: 35142148.
- 534 45. Ellul MA, Benjamin L, Singh B, et al. Neurological associations of COVID-19.  
535 *Lancet Neurol*. 2020;19(9):767-83. [https://doi.org/10.1016/s1474-4422\(20\)30221-0](https://doi.org/10.1016/s1474-4422(20)30221-0)
- 536 46. Collaborators GBD, et al. Global, regional, and national burden of stroke and its risk  
537 factors, 1990–2019: a systematic analysis for the Global Burden of Disease Study  
538 2019. *Lancet Neurol*. 2021;20(10):795-820. [https://doi.org/10.1016/s1474-](https://doi.org/10.1016/s1474-4422(21)00252-0)  
539 [4422\(21\)00252-0](https://doi.org/10.1016/s1474-4422(21)00252-0)
- 540 47. Nannoni S, de Groot R, Bell S, et al. Stroke in COVID-19: a systematic review and  
541 meta-analysis. *J Stroke*. 2021;16(2):137-49. doi: 10.1177/1747493020972922.
- 542 48. Klok FA, Kruip MJ, van der Meer NJ, et al. Incidence of thrombotic complications in  
543 critically ill ICU patients with COVID-19. *Thromb Res*. 2020 Jul; 191:145-7. doi:

544 10.1016/j.thromres.2020.04.013. Epub 2020 Apr 10. PMID: 32291094; PMCID:  
545 PMC7146714.

546 49. Oliveira LMDM, Nascimento NSD, Pereira ABCNDG. COVID-19 and the incidence  
547 of ischemic stroke after infection: an integrative literature review. Rev Bras Neurol  
548 (Online). 2024;5-10. <https://doi.org/10.46979/rbn.v60i1.64134>

549 50. Paniz-Mondolfi A, Bryce C, Grimes Z, et al. Central nervous system involvement by  
550 severe acute respiratory syndrome coronavirus-2 (SARS-CoV-2). J Med Virol. 2020.  
551 Available from: <https://doi.org/10.1002/jmv.25915>.

552 51. Katsoularis I, Fonseca-Rodríguez O, Farrington P, et al. Risk of acute myocardial  
553 infarction and ischemic stroke following COVID-19 in Sweden: a self-controlled case  
554 series and matched cohort study. Lancet. 2021;398(10300):599-607.  
555 [https://doi.org/10.1016/s0140-6736\(21\)00896-5](https://doi.org/10.1016/s0140-6736(21)00896-5)

556

557

558 All worksheets can be provided by the corresponding author through the email  
559 request [andrezamlb@gmail.com](mailto:andrezamlb@gmail.com)

560
